# Supplementary material
Source: Research Square preprint supplement (doi:10.21203/rs.3.rs-9164758/v1)
Supplement: Supplementary file 1 [file 3cc19b91d2bcff832dd4590c.docx]

**SUPPLEMENTARY FILE 1:**

**QUESTIONNAIRE USED IN THE STUDY (ENGLISH VERSION)**

**STUDY QUESTIONNAIRE**

**Participant Information and Consent Statement Study**

**Title:** State and Grade-Level Predictors of Sex Education Knowledge and Attitudes among In-School Adolescents in Nigeria: A Multistate Cross-Sectional Study

**Research Team:** Dr. Henry Osaro Aisagbonhi and colleagues

**Ethical Approval:** This study was reviewed and approved by the Health Research Ethics Committee of Olabisi Onabanjo University Teaching Hospital (OOUTH) Approval Number: OOUTH/HREC/607/2023AP, dated June 15, 2023.

**Purpose of the Study**: We are conducting a study to understand the knowledge and attitudes of senior secondary school adolescents toward sex education in selected states in Nigeria.

**What Your Participation Involves:** You will be asked to complete a short questionnaire. This will take approximately 20 minutes.

**Voluntary Participation**: Participation is entirely voluntary. You may choose not to answer any question and you may stop at any time without giving a reason. There are no penalties for withdrawing.

**Confidentiality and Anonymity**: All information provided will be kept confidential. No names or personal identifiers will be collected. Your responses will be used only for research purposes.

**Benefits and Risks:** There are no direct risks to you. Your participation may help improve school-based sex education programs for adolescents in Nigeria.

**Consent:** By proceeding to fill out this questionnaire, you confirm that you:

- Have been informed about the purpose of the study
- Understand that participation is voluntary
- Consent to take part in the study

If you have any questions, please ask your teacher or the research assistant present.

DATE: _____________________________ SIGNATURE: _________________

**STUDY TITLE**; **State and Grade-Level Predictors of Sex Education Knowledge and Attitudes among In-School Adolescents n Nigeria: A Multistate Cross-Sectional Study**

**SECTION A: DEMOGRAPHICS– (Choose the right option)**

A1. What is your age as at your last birthday? __________________________
A2. What is your gender? Male / Female
A3. What is your religion? Christian / Muslim / Others
A4. What is your tribe? Ibo / Yoruba / Hausa / Others
A5. My school is a: Public school / Private school
A6. I am currently in: SS1 / SS2 / SS3
A7. I am from a: Polygamous family / Monogamous family
A8. How would you describe your family? Upper Class / Middle Class / Lower Class

**SECTION B: SEX ORIENTATION & CURRICULUM EXPOSURE – (Choose the right option)**

B1. Have you heard of sex education? Yes / No
B2. If Yes, where did you hear it from? Parents / School / Television / Internet / Friends / Radio
B3. Have you ever received sex education? Yes / No

**SECTION C: KNOWLEDGE ITEMS / INFORMATION SOURCES – (Tick Yes/No)**

C1. Have you had any teaching on sex education before — Yes / No

C2. Sex education is the provision of information about one’s bodily development — Yes / No

C3. Sex education includes information about puberty and reproduction — Yes / No

C4. Sex education includes information on use of contraceptives — Yes / No

C5. Sex education provides information on how to prevent unwanted pregnancies and STIs — Yes / No

C6. Sex education provides information on how to prevent STIs through abstinence — Yes / No

C7. Sex education gives young people complete and honest information — Yes / No

C8. Sex education treats sexual development as a normal part of human development — Yes / No

C9. Sex education gives people the skills to make healthy choices — Yes / No

C10. Information on sex education can be obtained at home, in school or on the internet — Yes / No

**SECTION D: ATTITUDES ITEMS – (Choose: Strongly Agree / Agree / Not sure / Disagree / Strongly Disagree)**

| **S/N** | **Items** | **Strongly Agree** | **Agree** | **Not sure** | **Disagree** | **Strongly Disagree** |
| --- | --- | --- | --- | --- | --- | --- |
| D1. | Sex education should be taught in all schools |  |  |  |  |  |
| D2. | Sex education programs should be organized in schools |  |  |  |  |  |
| D3. | Parents should be involved in teaching their children about sex education |  |  |  |  |  |
| D4. | Adolescents should not be denied sex education |  |  |  |  |  |
| D5. | Sex education teaches young people good things and should be approved |  |  |  |  |  |
| D6. | Sex education helps adolescents make decisions about their health |  |  |  |  |  |
| D7. | It is not proper to engage in sexual practices before marriage |  |  |  |  |  |
| D8. | Adolescents should have access to private counselling sessions following sex education classes |  |  |  |  |  |
| D9. | Sex education can help young people understand healthy and unhealthy relationships. |  |  |  |  |  |

**SECTION E: FACTORS CONTRIBUTING TO POOR SEX EDUCATION IN SCHOOLS (BARRIERS) – (Tick all that apply)**

| **S/N** | **Items** | **Tick** |
| --- | --- | --- |
| E1. | Low manpower (few teachers) |  |
| E2. | No government policy on sex education |  |
| E3. | Sex education is not in the school curriculum |  |
| E4. | Poor awareness of the importance of sex education |  |
| E5. | Lack of funding |  |
| E6. | Lack of standards on what should be taught |  |
